# Supplementary material
Source: publisher figshare collection journal article supplement (https://gsapubs.figshare.com/ndownloader/files/22409619)
Supplement: Supplementary file 1 [file 22409619]

## Sheet: Sheet1
Coble, M.A., and Mahood, G.A., 2016, Geology of the High Rock caldera complex, northwest Nevada, and implications for intense rhyolitic volcanism associated with flood basalt magmatism and the initiation of the Snake River Plain–Yellowstone trend: Geosphere, v. 12, doi:10.1130/GES01162.1.
Supplemental Table 3: Normalized raw data for all whole-rock analyses in the HRCC
	MC275	MC279	MC326	MC414	MC285	MC302	MC340	MC340	MC82a	MC402	MC221	MC273	MC500	MC502	MC503	MC274	MC81	02PF45	02PF52	MC51	MC407B	MC85	MC286	MC426	MC241	MC352B	MC435	MC379	MC431	MC217	MC218	MC501	MC335	MC314	MC437	MC429B	M62	MC105b	MC108	MC121	MC121 R	MC227	MC369	MC100	MC124	MC212	MC316	MC389	MC138
Lat.	41.6725	41.8631	41.6543	41.7796	41.5622	41.5583	41.5428	41.5428	41.5879	42.1594	41.9089	41.6711	41.7646	41.9982	42.0695	41.6748	41.5868	41.7586	41.7381	42.0476	41.9624	41.5689	41.5534	41.4147	41.576	41.5818	41.666	41.7263	41.7486	41.5781	41.5989	41.6454	41.6216	41.5755	41.5755	41.5846	41.333	41.3884	41.2975	41.3045	41.3045	41.3877	41.2687	41.4873	41.4902	41.5349	41.5043	41.4685	41.2553
Long.	-118.968	-118.99	-118.993	-118.894	-119.528	-119.501	-119.447	-119.447	-118.914	-119.259	-119.371	-118.949	-118.901	-119.354	-119.244	-118.955	-118.915	-118.715	-118.836	-118.418	-118.746	-119.021	-119.54	-119.069	-119.578	-119.578	-119.729	-119.144	-119.256	-119.168	-119.12	-119.12	-119.388	-119.326	-119.326	-119.373	-119.097	-119.178	-119.174	-119.169	-119.169	-119.179	-119.309	-119.103	-119.085	-119.18	-119.15	-119.111	-119.425
Unit	Mtbm	Mtbm	Mtbm	Mtbm	Mics	Mics	Mics	Mics	Miic	Miic	Miic	Miic	Miic	Miic	Miic	Miic	Mioc	Mioc	Mioc	Mioc	Mioc	Misl	Misl	Misl	Misl	Misl	Misl	Mtab	Mtab	Mtab (Alk)	Mtab (Alk)	Mtab (Alk)	Mtab (BM)	Mtab (BM)	Mtab (BM)	Mtab (BM)	Mism	Mism	Mism	Mism	Mism	Mism	Mism	Mttm	Mttm	Mttm	Mttm	Mttm	Miyc
type	Pumice	Pumice		Pumice	welded	welded	Pumice	Pumice	welded	Pumice	welded	welded	Welded	welded	welded	Welded					welded	welded	Fiamme	Pumice	Pumices	pumice	Pumice	pumice	pumice		Pumice	Welded	Welded	silicified	silicified	silicified	welded	welded	welded	welded	welded	welded	welded	welded	welded	welded	Welded	Pumice	Pumice
																									Anomalous	Anomalous	Anomalous
	Normalized Major Elements (Weight %):																								See supplemental text for discussion
SiO2	77.1937	76.8882	75.9042	77.4419	75.9373	76.095	75.3651	75.5725	75.965	76.7192	76.6555	76.0467	73.9958	76.5273	76.3034	74.2924	75.6337	76.2394	76.1258	76.5144	76.2815	70.1114	71.7924	71.3106	68.7688	68.6984	70.2903	74.4701	83.5971	80.0797	76.0854	78.0176	77.5247	77.899	82.4895	76.7064	76.57	78.0402	76.9508	76.9791	76.8428	77.2302	77.0586	76.9303	74.4931	76.7399	76.5212	76.7667	75.2853
TiO2	0.175085	0.185253	0.222356	0.169272	0.279282	0.27607	0.297062	0.291866	0.224896	0.155093	0.17459	0.241481	0.394422	0.18396	0.200092	0.414711	0.257211	0.211387	0.21548	0.203595	0.200741	0.554669	0.413708	0.476079	0.683482	0.70463	0.439985	0.298054	0.0973316	0.130035	0.120135	0.134178	0.132468	0.139998	0.100966	0.130467	0.23326	0.220275	0.249912	0.242669	0.240283	0.24381	0.246146	0.270106	0.269003	0.267006	0.271558	0.288185	0.144275
Al2O3	12.091	12.849	12.1285	12.2722	11.7444	11.6222	12.6093	12.5085	11.9536	11.6837	11.6362	11.8037	12.5765	11.7223	11.8051	12.5243	11.6101	11.5511	11.5949	11.2764	11.3418	14.8664	14.6565	14.6876	15.2469	15.2747	15.5604	12.9077	9.11673	9.86096	11.4182	11.2306	11.453	11.4999	9.11726	11.3042	11.0545	10.3505	10.3268	10.4206	10.4772	10.5468	10.4305	11.4045	11.7947	11.4027	11.5342	12.3081	12.2229
Fe2O3*
FeO*	1.25812	1.15457	1.53696	1.19946	2.05901	2.05161	2.0644	2.04471	2.01598	1.79559	2.00238	2.1462	2.52211	2.02024	2.07389	2.46585	2.80306	2.36993	2.6563	2.53145	2.74555	2.60193	1.90421	1.90493	2.81009	2.80038	2.17263	2.10064	1.48886	1.44308	2.06564	1.53184	1.79063	1.48467	1.10837	1.66174	2.73826	2.27974	2.74731	2.60588	2.58332	2.70184	2.74603	1.77332	1.88986	1.76417	1.8818	1.94154	1.97693
MnO	0.0482738	0.0461286	0.0606425	0.063477	0.122103	0.118968	0.106349	0.0938141	0.0894476	0.0930557	0.0827795	0.0866231	0.130412	0.0927582	0.0747791	0.069074	0.0540073	0.0440806	0.0430959	0.0461319	0.0501852	0.162098	0.115509	0.030388	0.199787	0.210605	0.236089	0.112898	0.0648877	0.0216724	0.0409724	0.0227447	0.0376864	0.00999987	0.0201933	0.029567	0.141984	0.129779	0.14737	0.14613	0.147198	0.120007	0.132161	0.0900355	0.103463	0.112335	0.110987	0.125025	0.0520008
CaO	0.20263	0.266028	0.48514	0.285647	0.152054	0.164475	0.128486	0.125085	0.156665	0.279167	0.065633	0.156446	0.285489	0.055482	0.10418	0.414331	0.27959	0.230421	0.236001	0.147843	0.200741	0.72407	0.148319	0.557114	0.862239	0.841943	0.761925	0.956487	1.31938	0.140871	0.685022	0.0377042	0.0723743	0.0599992	0.0807731	0.586378	0.253543	0.113962	0.463039	0.400403	0.400935	0.0946255	0.114239	0.180071	2.12099	0.287244	0.112211	0.16495	0.425817
MgO	0.0743054	0.123994	0.282998	0.0952155	0.128944	0.122365	0.105191	0.114662	0.0588241	0.134414	0.0561332	0.101866	0.169461	0.049827	0.0900514	0.200461	0.0631295	0.0901649	0.164175	0.0151811	0.0401481	0.374192	0.108199	0.263363	0.578331	0.470099	1.07313	0.540684	0.58399	0.0866898	0.11454	0.029797	0.0271843	0.0499994	0.0605798	0.12262	0.0811338	0.0855809	0.128847	0.124881	0.127947	0.104637	0.101868	0.120047	0.486275	0.0979351	0.130019	0.0966579	0.0564298
K2O	6.59972	6.26394	5.12429	5.4167	4.88208	4.86502	7.02798	6.97351	4.90207	6.43118	4.78894	4.9137	5.13767	4.82077	4.79686	5.03627	5.56846	4.68857	5.79743	4.70956	4.67726	4.99496	5.33255	5.27739	6.6771	6.74295	6.32076	6.07991	3.1038	4.32365	6.93434	4.65724	4.78607	4.75994	3.82662	5.01666	4.56377	4.54565	4.50189	4.57684	4.61796	4.57892	4.55758	4.74187	4.50063	4.78792	4.79399	6.66483	6.95563
Na2O	2.26353	2.1249	3.88112	2.80357	4.53647	4.48652	2.1489	2.13688	4.49555	2.58488	4.33899	4.3303	4.54733	4.35821	4.34062	4.3384	3.55746	4.40806	3.00645	4.39011	4.28581	5.33718	5.30488	5.23687	3.76441	3.86086	2.88673	2.36709	0.475843	3.76017	2.34371	4.14131	4.04771	3.93995	3.07947	4.10099	4.36094	4.06532	4.25974	4.24422	4.29944	4.12559	4.36565	4.26168	4.05574	4.38879	4.50209	1.48844	2.77133
P2O5	0.0133831	0.0119818	0.131392	0.021159	0.0328935	0.0197671	0.015524	0.0104238	0.0301166	0.0103395	0.0392312	0.0290212	0.0958417	0.0198738	0.0518605	0.102265	0.0249888	0.0350641	0.0153914	0.0247201	0.0501852	0.0846346	0.0662898	0.0810348	0.136696	0.130132	0.064388	0.0187174		0.0216724	0.00880724	0.0260113	0.0183048	0.0199997	0.0100966	0.172357	0	0.0344587	0.0285585	0.0575315	0.057405	0.0439041	0.0405118	0.0400158	0.0827701	0.0250251	0.0144069	0.0154005	0.00493802
Trace	0.0802992	0.0860316	0.242403	0.231326	0.125426	0.178028	0.131709	0.128033	0.107861	0.113401	0.1596	0.143881	0.144981	0.149313	0.159168	0.141866	0.148248	0.131788	0.144979	0.140595	0.12608	0.188494	0.157475	0.174663	0.272115	0.265315	0.193666	0.147792	0.152128	0.131539	0.183169	0.170995	0.109893	0.136566	0.106172	0.168617	0.00263116	0.134506	0.195799	0.201756	0.205464	0.209688	0.206785	0.18803	0.2034	0.126973	0.127497	0.140132	0.104416
Total	100	100	100	100	100	100	100	100	100	100	100	100	100	100	100	100	100	100	100	100	100	100	100	100	100	100	100	100	100	100	100	100	100	100	100	100	100	100	100	100	100	100	100	100	100	100	100	100	100
LOI	4.27372	5.1385	1.39478	5.89278	0.250693	0.26191	4.27285	4.26333		3.61883	0.381977	0.3423	0.637115	0.29264	0.53714	1.08615		0.671337	3.70897		0.311148		0.477955	0.709054	3.99574	4.35056	6.54612	10.218	7.6892	1.07279	5.77421	0.394245	0.281777	0.289996	0.676474	1.93302	0.507086		0.471021	0.548756	0.549695	0.461508	0.20129	0.420166	2.67968	0.720246	0.378149	6.71192
Agpaitic Index (AI)			0.983759		1.08541	1.08816			1.06259		1.05892	1.05412	1.03701	1.05678	1.04472	1.00512	1.02323	1.06715		1.09254	1.06803											1.05551	1.03374	1.01166	1.00996	1.07719	1.09586	1.12151	1.15047	1.14545	1.15217	1.11345	1.16152	1.06481	0.978716	1.08769	1.09202
	Normalized Trace Elements (ppm)
Rb	221.783	231.874	174.853	199.953	207.741	204.872	213.358	213.688	192.6	230.571	188.774	172.713	157.989	185.313	186.514	155.473	189.389	182.333	210.349	195.751	175.648	152.452	166.395	169.16	134.593	125.594	208.188	254.458	126.531	165.794	348.563	222.358	200.415	197.998	155.488	204.385		206.916	225.962	219.838	221.339	227.481	228.234	226.089	217.272	229.734	221.308	250.774	191.565
Sr	9.14462	8.57615	44.4712	17.3504	4.33004	9.43221	2.22469	5.10766	9.63001	21.713	8.65468	11.3708	16.8983	6.50935	10.2088	22.8123	20.8327	11.0202	16.4175	4.46504	16.9626	51.223	4.54356	43.5562	42.2708	17.5077	56.6615	60.1346	493.147	29.4745	70.5855	6.00418	4.04471	14.7998	19.5875	24.2946	4.05669	4.99698	13.8447	12.9617	13.3928	3.36782	7.00229	17.807	47.3859	13.5673	4.57247	5.95277	15.4854
Ni			6.06425		0.201397	3.14407		8.33903	0.70958		2.95277	2.56099	4.07187	2.3393	4.49185	3.28826	1.36781	3.0055	1.02609	1.82661		6.99879								8.66898		2.03532	0.404471	4.99994	6.05798	2.79129			2.32429	2.85769	4.49834	3.26576	1.82668		6.20776			2.70746	2.27409
Cr	3.46865	1.4823			0.604191	4.66539	2.11875		1.72326		4.17461	3.68783	2.64672	3.15296	2.75636	5.03515	1.36781			0.304434		6.49163	1.31258			3.77412		1.33632			0.958174	3.25651	1.31453			2.99806		1.9376	3.13274	4.79684	4.49834	3.16371	3.14596			1.41748	3.65798	2.48934	2.1658
V	0	2.32933	9.09637		5.23632	7.91088	1.27125		0		5.90555	2.76587	10.9941	2.64442	5.30855	11.0979	2.41996	13.0238	3.07828	1.52217		17.852	5.25034	11.1423	8.41209	2.41124	13.9507	6.01346	8.6517	23.8397		3.46004	7.48271	6.99991		7.65021		7.54646	10.0046	6.12362	7.36093	11.022	4.26226	8.00315	11.3809	7.89741	5.08052	6.27747	2.70725
Ga	18.2892	20.1169	20.2142	20.1011	23.8656	23.327	24.3657	27.1018	23.3148	23.7809	21.484	22.8441	20.9702	21.4605	21.7446	20.3461	27.777	23.0421	22.574	27.0946	27.1	21.7064	22.5159	24.3104	24.1848	22.1205	24.6821	25.3902	18.3849	23.8397	26.9353	24.0167	23.156	25.9997	20.1933	26.0521		20.1919	23.6471	23.576	23.923	24.085	24.6602	25.0099	25.8657	23.186	23.3704	25.2181	24.2569
Cu	2.41754		16.1713	6.3477	1.10768	1.4199	0.635626		1.11505		2.74913	2.56099	3.05391	1.83075	4.59394	2.15792	6.10252	3.0055	4.10437	2.334		8.3174				1.46771	16.097				1.59696	3.66357	2.42683	0	11.1063	4.65216		3.16135	2.22323	3.26593	4.39611	2.0411	1.31927		11.3809	0.506244	0.406442		4.54817
Zn	61.5948	69.3504	62.6639	68.7668	133.627	125.661	139.732	126.128	95.2864	98.2254	85.1213	91.1714	95.8926	92.8599	89.6328	94.6403	184.549	167.306	185.723	185.705	137.507	116.545	106.319	76.983	134.593	151.594	106.24	152.786	104.902	81.2716	167.255	119.575	125.184	113.999	71.6861	133.052		154.702	164.823	170.747	173.8	167.983	169.07	112.044	118.982	128.384	140.222	134.857	156.046
Ba	7.77818	12.5995	57.105	20.1011	25.1746	71.198	10.4878	15.6357	47.1364	17.6806	64.5537	32.6783	106.072	30.004	54.4126	109.335	101.007	46.5251	37.2267	26.9932	35.0292	723.512	442.644	631.058	1640.36	1587.33	710.414	8.90883	201.152	79.2128	20.7604	24.7291	26.0884	35.9995	49.6754	24.7081	19.2693	39.3639	41.2309	38.1706	34.0443	27.861	21.9202	49.0193	180.025	12.6561	22.1511	43.7258	14.186
Th	23.2294	23.6109	20.012	20.8416	26.1816	25.0511	28.6032	28.2485	20.8819	23.4707	20.2621	19.0538	16.6947	20.6468	20.8259	15.722	18.518	17.6222	18.4286	18.8749	17.4644	16.4319	21.7081	18.8406	14.1954	13.7336	19.2091	29.065	15.4649	18.2048	38.9658	24.4238	22.5492	20.8997	16.3565	20.3661		23.1207	28.0936	27.8625	27.5012	28.7795	28.618	25.5101	26.4864	29.8684	25.8091	31.1709	16.525
Nb	21.5477	22.5521	20.2142	21.159	29.5047	29.5137	30.616	32.3137	21.997	28.9506	25.1495	21.6148	20.563	24.41	24.3989	20.3461	29.8813	27.1296	33.8713	28.2109	29.1074	21.8078	25.5449	25.3234	24.1848	20.0238	24.6821	31.1809	28.118	28.1742	56.2129	35.8216	30.6387	29.9996	24.2319	30.0839		64.5528	32.1359	32.9655	33.0219	32.9638	35.2144	28.011	30.0042	30.4759	29.1622	31.4956	52.0874
Y	60.7539	70.0915	56.5997	54.0613	85.6945	64.4027	87.6104	81.7225	50.887	65.5525	59.2591	60.2346	62.4015	49.4303	55.4335	59.908	80.4901	89.9044	102.024	39.3735	29.81	73.8423	76.6347	71.8171	74.8676	78.942	79.9485	85.9702	47.2599	72.6027	164.167	111.23	72.198	86.0989	52.3006	89.7349		102.489	54.5703	95.0182	98.4524	105.423	87.7823	62.8248	90.9437	92.2377	64.9291	94.7032	64.4324
U	7.67307	7.62325	7.61063	8.28375	11.0768	5.67961	8.89876	10.6323	6.99443	9.67779	6.82193	6.14639	6.92219	7.22131	7.45239	5.54894	6.20774	5.92083	7.00822		1.30481	5.17302	8.17841	7.93128	5.78331	3.45961	6.91098	10.802	6.92136	7.47699	15.3308	11.0925	7.88718	8.1899	6.22962	8.47726		3.77323	4.44647	6.53187	7.05422	7.0418	4.16078	7.24286	10.6567	10.2261	9.95782	11.1479	7.36371
Pb	16.8177	22.1286	18.1927	21.159	22.6572	22.9213	27.4378	30.229	20.2737	26.8827	20.1603	18.8489	17.6109	20.8502	18.5799	21.4765	31.5648	25.3263	30.3108	26.1813	25.0926	17.852	22.213	12.1552	14.7212	13.1046	12.8776	23.3857	20.5478	18.4216	40.5627	24.4238	26.594	30.9996	28.2706	39.9052		26.6166	29.3063	33.0676	33.6353	31.3309	33.8951	19.0075	21.7272	23.591	21.3382	26.084	28.4802
Cs			4.34605	6.4535		4.86824		9.58989		6.82408	7.33102	1.43416	3.3593	3.15296	4.18559	1.84965		3.72681	5.51012		1.40518			5.06467	4.83695		6.4388		5.19102	4.55121		6.92008		5.09994	4.44252	7.96035			4.24436	9.49162	7.25869	5.71509	3.04447	4.40174	6.932
Sc	4.62487	4.76453	5.05354		8.05588	7.70804	7.94532	5.21189	9.3259		6.10919	8.60494	10.7905	6.71276	6.94195	9.86478	4.20863	2.03372	1.3647	1.01478		12.679	10.0968	9.11641	14.7212	15.7255	10.7313	7.90658			2.12928	3.25651	1.31453			1.55072		7.95437	9.70139	10.3081	9.30339	10.0014	10.4527	7.00276	7.24239	7.39117	7.21434	8.00919	2.05751
Zr	290.105	315.941	269.859	239.097	567.94	578.509	614.015	588.944	462.95	480.788	484.866	434.14	391.714	481.387	473.278	375.273	628.77	585.02	642.026	641.95	584.155	469.426	525.842	490.26	360.668	361.162	487.203	631.524	302.809	390.104	766.22	525.112	465.95	434.995	348.334	490.544		601.575	673.438	628.284	641.73	701.731	709.362	484.191	519.383	562.539	559.264	608.698	402.188
La	53.9217	49.0217	55.3868	52.1569	62.2317	61.0558	58.5835	61.6046	65.3827	63.0711	73.0048	58.1858	52.2218	64.3815	75.3406	55.2839	66.9173	65.2393	70.3079	30.2405	46.1704	56.0917	57.1479	58.345	56.2559	50.4264	56.8761	61.5823	23.1433	54.2895	57.9163	53.1218	56.1203	67.4992	42.2039	53.0346		59.3519	44.97	69.299	69.5199	62.4577	60.788	40.516	55.3525	37.6646	36.6814	48.8128	54.9029
Ce	101.116	106.62	114.21	105.583	115.199	108.115	120.451	131.34	119.615	129.244	121.267	120.367	109.839	112.185	141.289	100.497	132.888	122.704	136.809	74.282	143.53	104.677	118.436	102.306	117.769	106.095	121.264	121.049	50.0717	113.78	121.475	108.889	136.509	128.998	106.015	120.853		137.06	137.133	145.232	149.979	136.958	138.219	82.3325	98.9103	90.0102	78.8497	109.964	119.444
Pr			13.6446	12.378				15.8442		15.6127								15.6987	6.97743		11.9441			15.194	15.5624		15.2385		6.30493	13.1118				17.4998	10.3995									13.3052	16.761
Nd	44.7771	43.0925	51.1418	47.9251	61.2247	57.506	53.4985	59.1029	57.1718	59.4522	68.7284	56.8541	53.2398	53.2953	66.1527	50.557	71.2311	65.1491	69.5589	37.9528	43.8618	61.569	57.3498	61.5864	64.037	63.0068	63.6368	58.6869	23.5759	47.1376	54.2966	49.0511	44.694	66.3992	36.9537	54.5853		30.7977	44.6668	63.5836	67.6796	66.4379	62.2087	55.1217	68.2854	48.4982	40.0345	57.1466	18.7341
Sm			10.006	9.73314				12.717		11.7871								16.0193	17.2691		9.03333			12.5604	14.1954		13.8434		5.51546	9.53587				14.1998	7.37054									12.605	15.209
Eu			0.464926	0.317385				0.917293		0.485957								0.841539	0.779831		0.612259			2.30949	4.20604		2.42528		0.129775	0.325087				0.269997	0.171643									1.0104	1.16913
Gd			8.8437	8.69635				12.0916		10.4429								14.9373	16.6945		6.8854			12.0539	13.7748		13.3069		5.74257	8.83152				13.9998	6.63349									11.5045	15.0021
Tb			1.58681	1.43881				2.15772		1.80942								2.59474	2.88332		1.19441			1.99548	2.19766		2.24285		1.21124	1.70129				2.39997	1.32266									2.06081	2.44172
Dy			10.3092	9.25706				14.1764		11.2701								16.1896	18.09		6.74489			12.6617	13.6696		14.0581		8.11097	12.0282				15.9998	8.6831									12.5049	15.9333
Ho			2.19324	2.02068				3.2001		2.41945								3.29603	3.76576		1.33493			2.72479	2.94423		3.10136		1.75197	2.71989				3.41996	2.05971									2.72107	3.466
Er			6.53928	6.24191				9.85048		7.44445								9.21685	10.538		4.2557			8.06296	8.696		8.98213		5.51546	8.46309				9.99987	6.17914									7.98315	10.5532
Tm			1.07135	1.00505				1.55314		1.15803								1.39255	1.5494		0.692555			1.25604	1.26181		1.41654		0.897614	1.3762				1.59998	1.07024									1.23049	1.72783
Yb			7.17603	6.66509				10.3196		7.96143								8.74599	9.68632		5.52037			8.50865	8.09664		9.33626		6.05619	9.7526				10.3999	7.06764									8.50335	11.3809
Lu			1.1421	1.00505				1.59484		1.27176								1.37251	1.50836		0.632333			1.24591	1.28284		1.42727		0.800282	1.4954				1.58998	1.11063									1.33052	1.84164
[truncated: 168 more columns]
